# Supplementary material for: Initial Nutritional Status and Clinical Outcomes in Patients With Deep Neck Infection
Source: PubMed Central journal article supplement — Clin Exp Otorhinolaryngol. 2018 Jul 20;11(4):293–300. doi: 10.21053/ceo.2018.00108 (PMC6222194; doi:10.21053/ceo.2018.00108), 2018-07-20
Supplement: ceo-2018-00108-suppl1.pdf [file ceo-2018-00108-suppl1.pdf]

**Supplementary Table 1.** Univariate analyses of patient age and general condition with initial clinical presentation, treatment response, and clinical outcome (n=135)

| Variable                                              | Age >70 yr<br>(n=46, 34.1%) |                     | CCI >1<br>(n=73, 54.1%)   |         | Chronic hepatitis or ESRD<br>(n=8, 5.9%) |                     |
|-------------------------------------------------------|-----------------------------|---------------------|---------------------------|---------|------------------------------------------|---------------------|
|                                                       | OR (95% CI) <sup>a)</sup>   | P-value             | OR (95% CI) <sup>a)</sup> | P-value | OR (95% CI) <sup>a)</sup>                | P-value             |
| Initial presentation                                  |                             |                     |                           |         |                                          |                     |
| Necrotizing fasciitis                                 | 4.30 (1.02–18.07)           | 0.046 <sup>b)</sup> | 7.51 (1.29–61.80)         | 0.041   | 2.13 (1.23–19.45)                        | 0.045 <sup>b)</sup> |
| Simultaneous mediastinitis                            | 1.49 (0.56–4.02)            | 0.428               | 0.57 (0.21–1.52)          | 0.263   | 2.16 (1.40–11.57)                        | 0.037 <sup>b)</sup> |
| Bilateral involvement                                 | 1.39 (0.60–3.22)            | 0.439               | 1.14 (0.51–2.59)          | 0.747   | 2.22 (0.94–9.89)                         | 0.092               |
| Extended to >1 cervical level                         | 1.34 (0.63–2.83)            | 0.444               | 1.30 (0.64–2.62)          | 0.467   | 1.82 (0.35–9.38)                         | 0.473               |
| Serum CRP >20 mg/dL                                   | 2.10 (1.02–4.33)            | 0.044 <sup>b)</sup> | 1.36 (0.69–2.70)          | 0.375   | 4.06 (1.78–20.88)                        | 0.009 <sup>b)</sup> |
| Clinical outcomes and treatment response              |                             |                     |                           |         |                                          |                     |
| Length of hospitalization >14 days                    | 3.11 (1.45–6.69)            | 0.004 <sup>b)</sup> | 1.95 (0.98–3.88)          | 0.057   | 2.69 (0.52–13.82)                        | 0.237               |
| No. of surgical drainage >1                           | 1.13 (0.55–2.31)            | 0.743               | 1.29 (0.65–2.56)          | 0.466   | 4.19 (0.81–21.57)                        | 0.087               |
| Death                                                 | 1.69 (0.49–5.86)            | 0.410               | 1.54 (0.43–5.52)          | 0.509   | 1.08 (0.23–2.12)                         | 0.913               |
| 1-Week follow-up CRP >5 mg/dL                         | 1.24 (0.60–2.54)            | 0.562               | 0.71 (0.36–1.41)          | 0.324   | 0.81 (0.19–3.54)                         | 0.781               |
| Time interval for 50% decrease of initial CRP >7 days | 2.26 (1.01–5.05)            | 0.047 <sup>b)</sup> | 1.21 (0.55–2.66)          | 0.643   | 1.03 (0.20–5.38)                         | 0.970               |

OR, odds ratio; CI, confidence interval; CCI, Charlson comorbidity index; ESRD, end-stage renal disease; CRP, C-reactive protein.

<sup>a)</sup>The OR was calculated using univariate logistic regression analysis. <sup>b)</sup>P-value <0.05.

**Supplementary Table 2.** Differences in the clinical manifestations according to 2-week serum albumin level (n=73)

| Patient demographics            | 2-Week hypoalbuminemia<br>(serum albumin <3.0 g/dL, n=41) | 2-Week normoalbuminemia<br>(serum albumin ≥3.0 g/dL, n=32) | P-value <sup>a)</sup> |
|---------------------------------|-----------------------------------------------------------|------------------------------------------------------------|-----------------------|
| Age (yr)                        | 63.3±15.8                                                 | 67.7±14.3                                                  | 0.219                 |
| CCI >1                          | 26 (63.4)                                                 | 19 (59.4)                                                  | 0.725                 |
| IV albumin replenishment >1     | 16 (39.0)                                                 | 22 (68.8)                                                  | 0.012 <sup>b)</sup>   |
| Length of hospitalization (day) | 27.4±14.2                                                 | 28.0±13.7                                                  | 0.848                 |
| No. of surgical drainage        | 1.7±1.0                                                   | 2.1±1.3                                                    | 0.153                 |
| No. of dead patients            | 4 (9.8)                                                   | 3 (9.4)                                                    | 1.000                 |

Values are presented as mean±standard deviation or number (%).

CCI, Charlson comorbidity index; IV, intravenous.

<sup>a)</sup>The values or the portion of each clinical factor between hypoalbuminemia and normoalbuminemia group at 2-week treatment were compared using the Student t-test, chi-square, and Fisher exact test. <sup>b)</sup>P-value <0.05.

**Supplementary Table 3.** Univariate and multivariate analyses of the clinical outcome in patients who did not receive any intravenous albumin replenishment (n=73)

| Variable                           | Univariate analysis       |                     | Multivariate analysis <sup>a)</sup> |                     |
|------------------------------------|---------------------------|---------------------|-------------------------------------|---------------------|
|                                    | OR (95% CI) <sup>b)</sup> | P-value             | OR (95% CI) <sup>b)</sup>           | P-value             |
| Serum albumin >3.0 g/dL            | 3.44 (1.30–9.12)          | 0.013 <sup>c)</sup> | 3.83 (1.39–10.51)                   | 0.009 <sup>c)</sup> |
| Length of hospitalization >30 days | 2.44 (1.18–6.70)          | 0.028 <sup>c)</sup> | 2.47 (0.88–6.88)                    | 0.085               |
| No. of surgical drainage >1        | 1.46 (0.58–3.67)          | 0.426               | 1.48 (0.58–3.77)                    | 0.409               |
| Death                              | 3.00 (0.54–16.59)         | 0.208               | 3.19 (0.57–18.07)                   | 0.189               |

OR, odds ratio; CI, confidence interval.

<sup>a)</sup>Patients' age and Charlson comorbidity index was adjusted for the multivariate analysis. <sup>b)</sup>The OR was calculated using univariate logistic regression analysis. <sup>c)</sup>P-value <0.05.
